# Supplementary material for: One dimensional CdS nanostructures: heterogeneous catalyst for synthesis of aryl-3,3′-bis(indol-3-yl)methanes
Source: Royal Society of Chemistry journal article supplement (doi:10.1039/c4ra03419h), 2014-01-01

**Supporting Information:**

**<sup>1</sup>H NMR : 3, 3'- ((4-fluorophenyl) methylene bis(1*H* indole))**

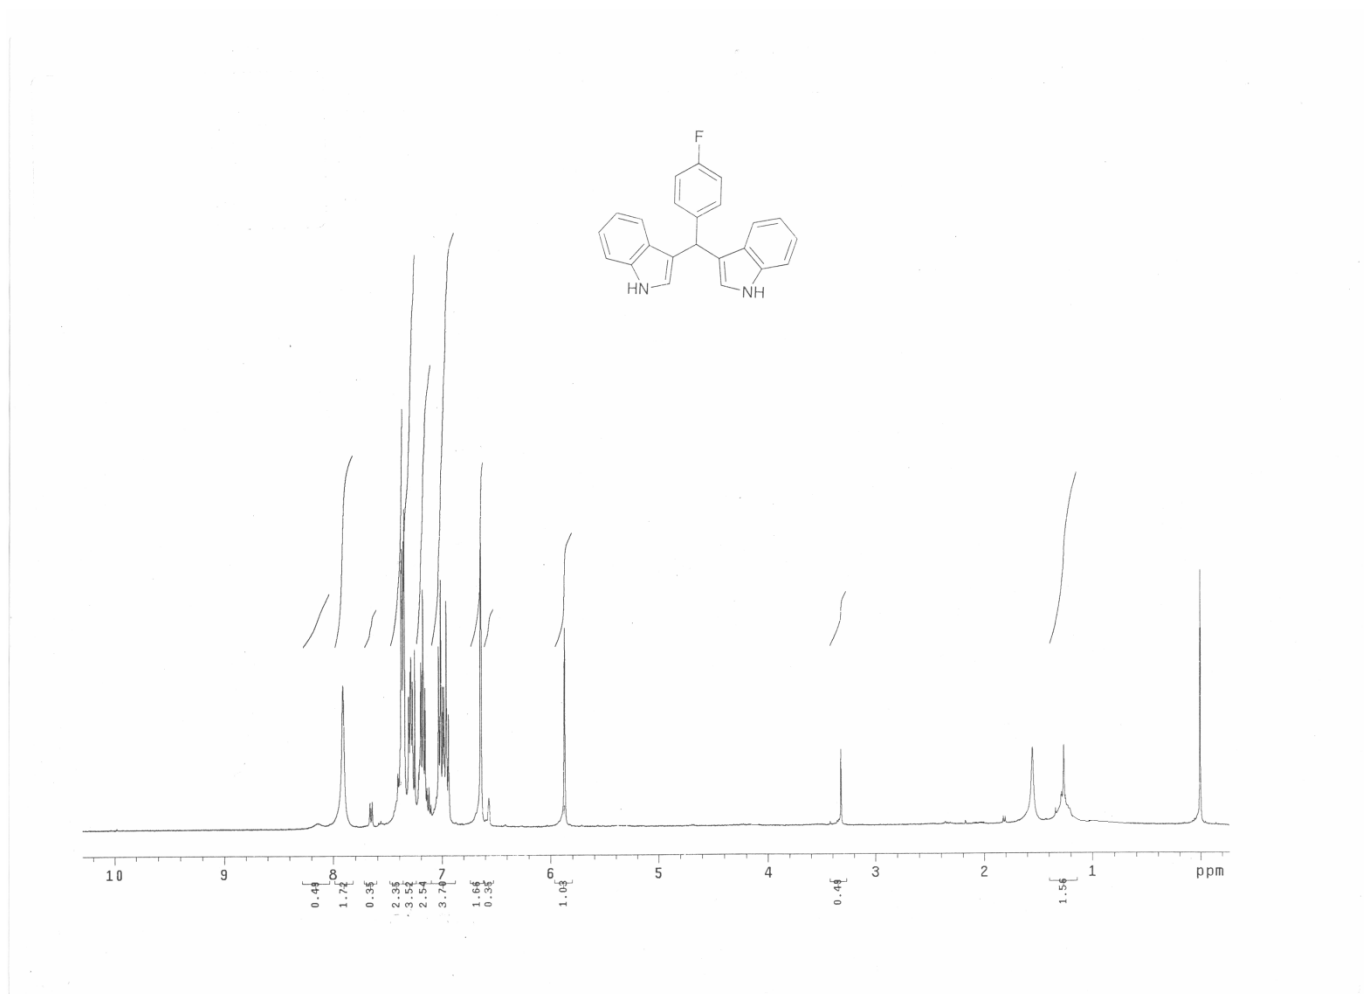

**<sup>1</sup>H NMR : 3,3'-((4-nitrophenyl) methylene bis(1*H* indole))**

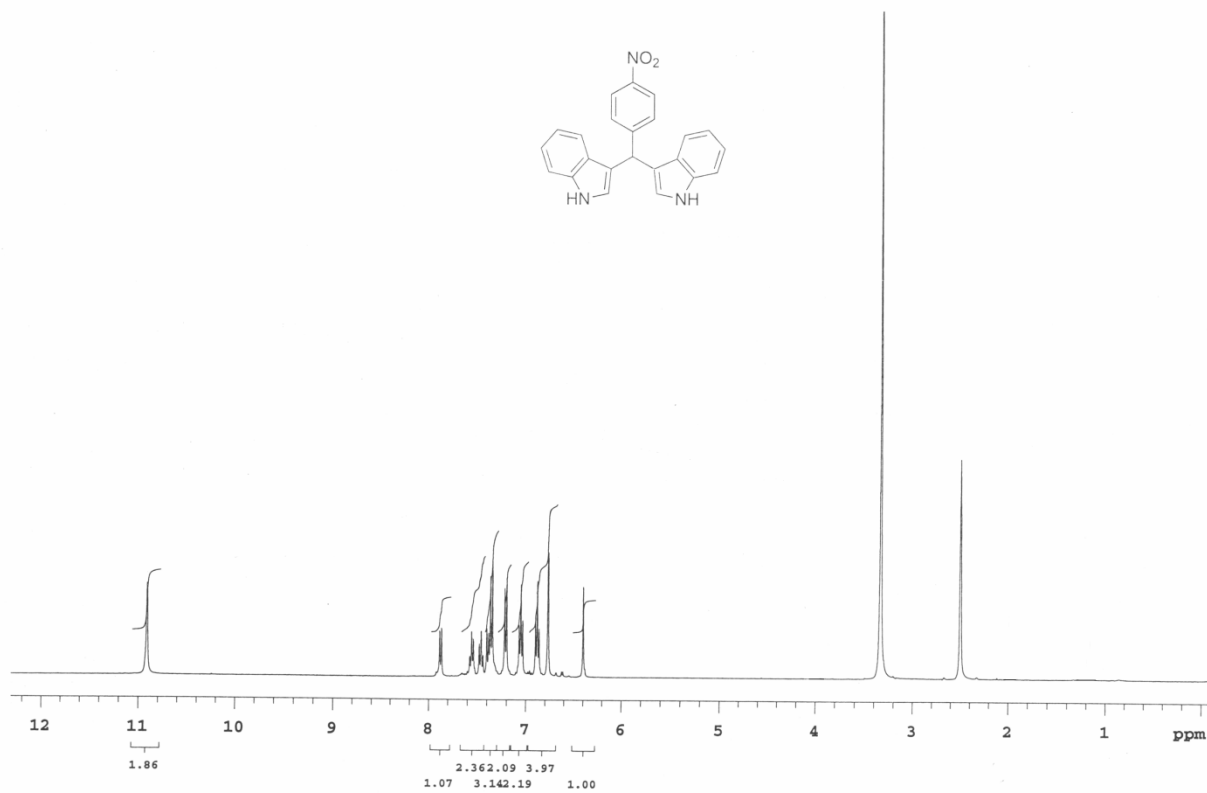



**<sup>1</sup>H NMR :**

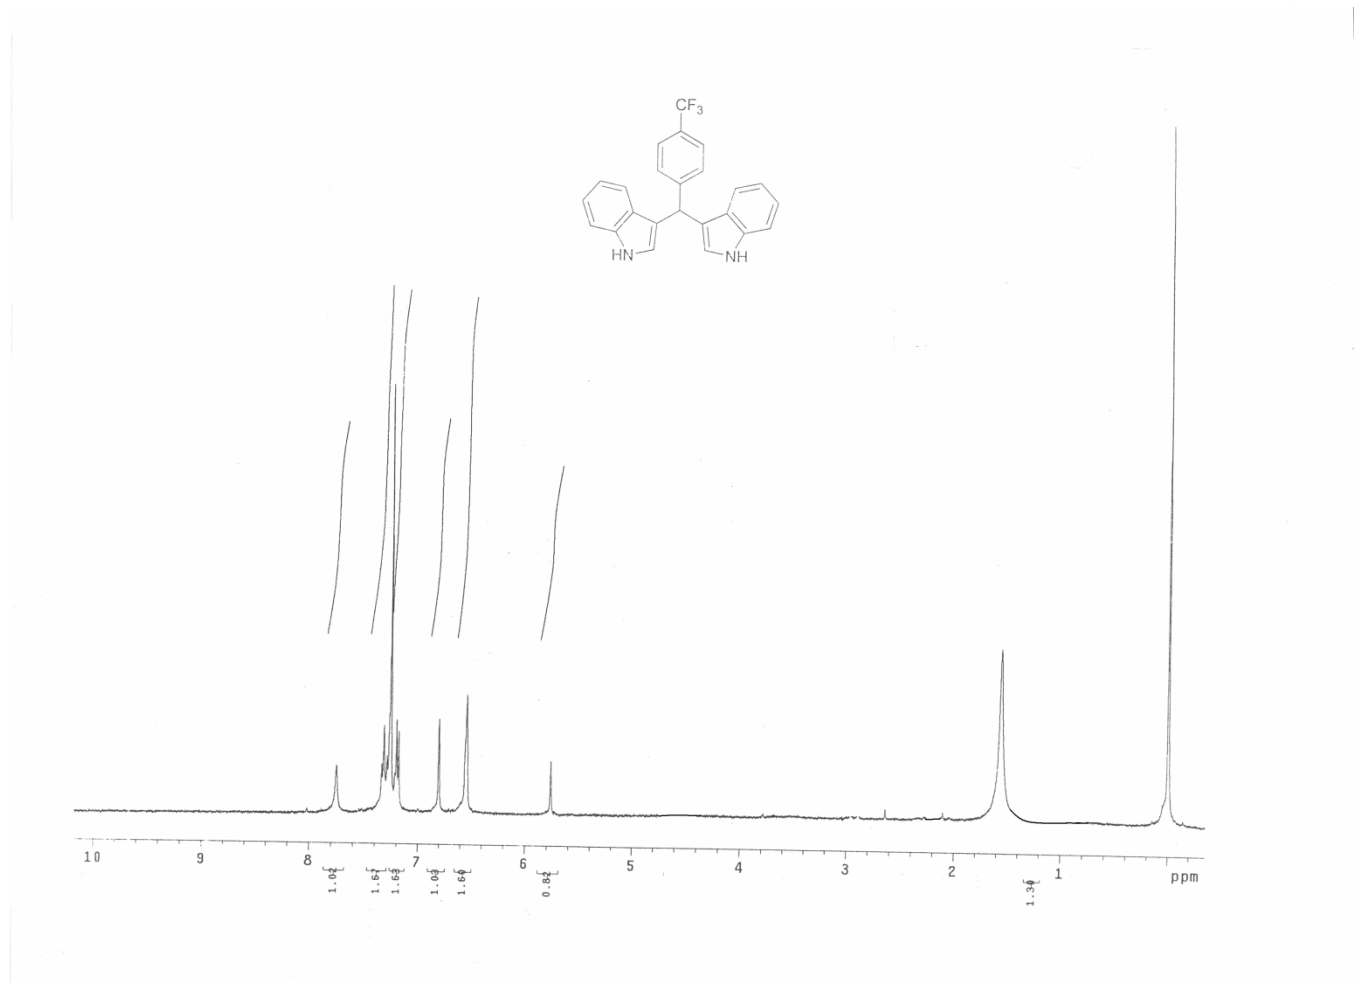

$^{13}\text{C}$  NMR

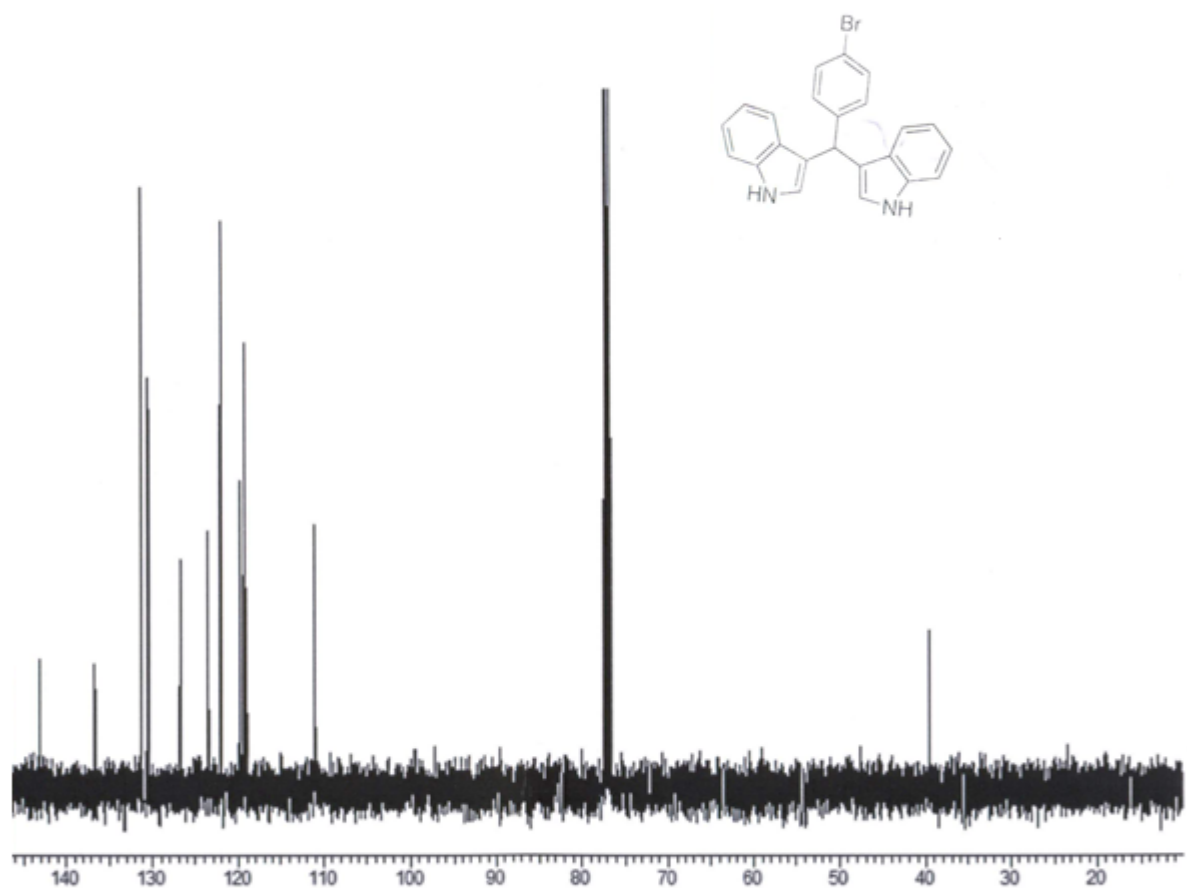

<sup>13</sup>C NMR

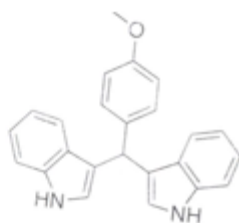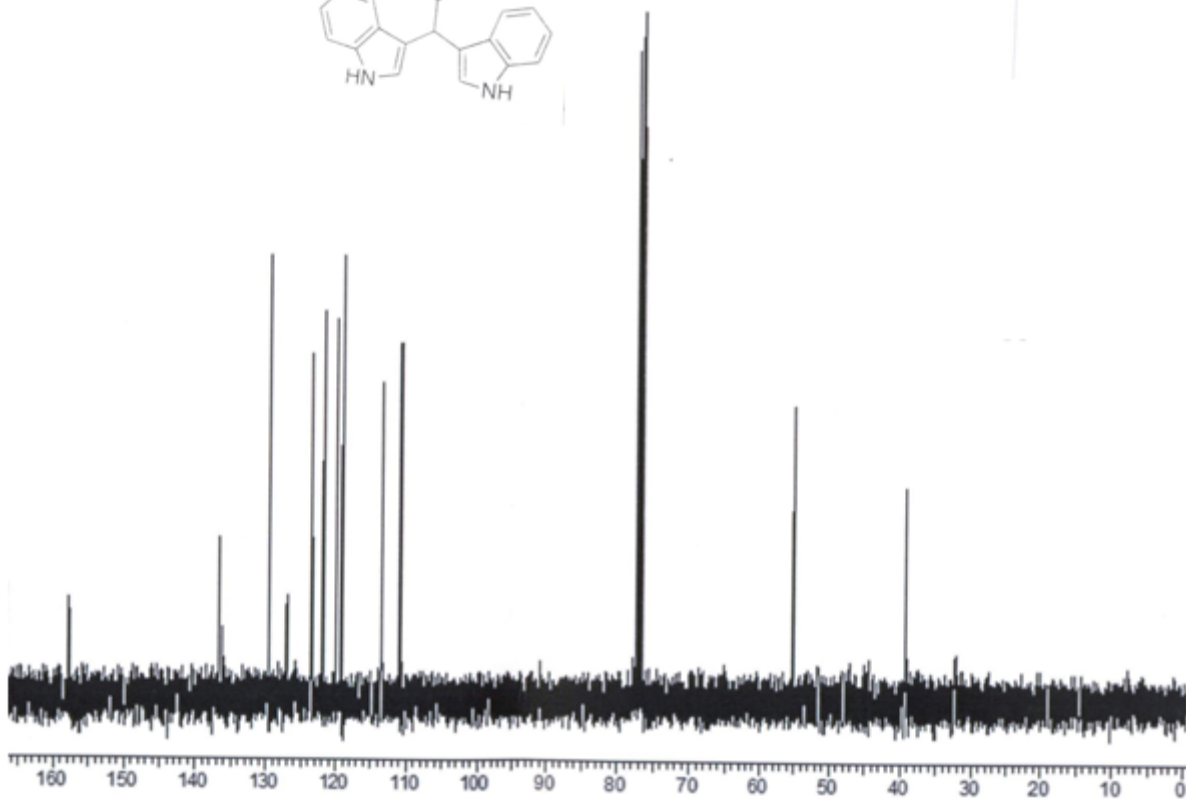

$^{13}\text{C}$  NMR

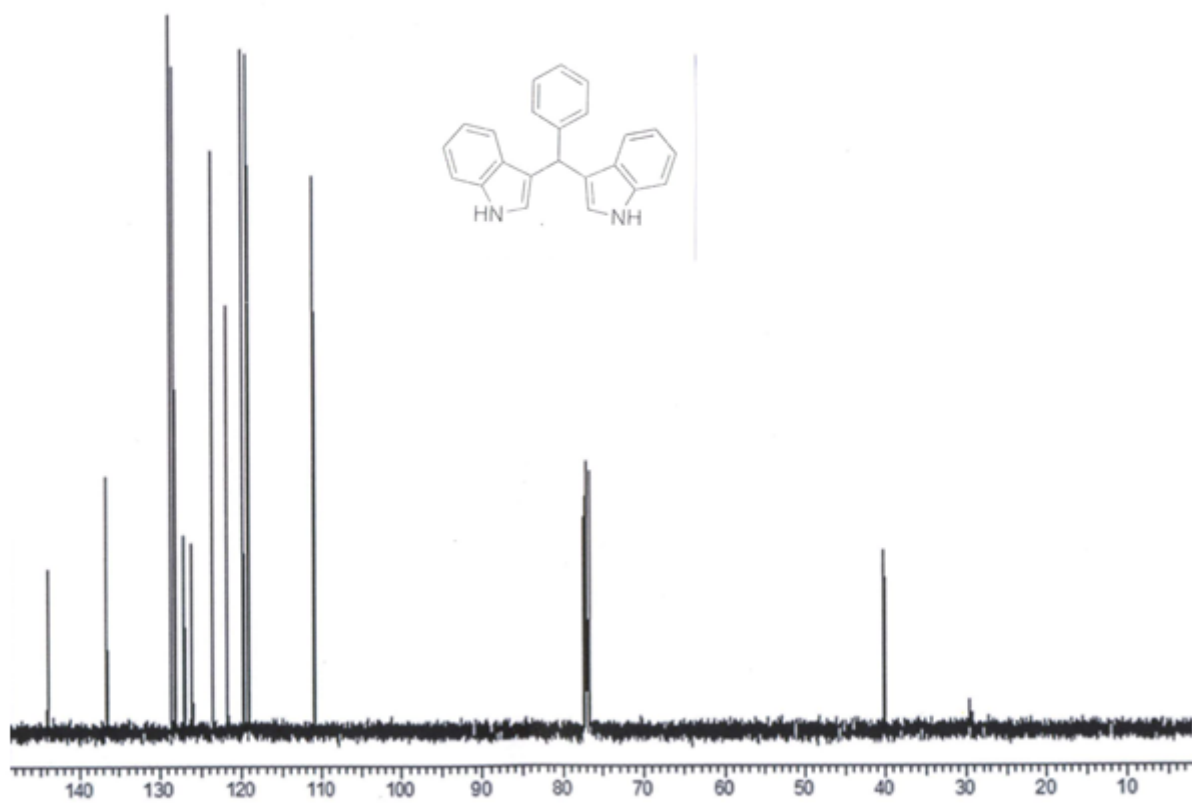

Supplement: c4ra03419h1.pdf [file c4ra03419h1.pdf]
